# Supplementary material for: Construction of honeycomb porous silicon as a high-capacity and long-life anode toward Li-ion batteries
Source: Royal Society of Chemistry journal article supplement (doi:10.1039/d4ce00275j), 2024-01-01
Supplement: d4ce00275j1.pdf [file d4ce00275j1.pdf]

## **Electronic Supporting Information**

### **Construction of honeycomb porous silicon as a high-capacity and long-life anode toward Li-ion batteries**

Guangrui Han, Lang Liu, Minyu Jia, Xuting Li,\* Linrui Hou, Changzhou Yuan\*

School of Material Science & Engineering, University of Jinan, Jinan, 250022, P. R.  
China

\*E-mail: mse\_lixt@ujn.edu.cn (*Dr. X. Li*)

mse\_yuancz@ujn.edu.cn; ayuancz@163.com (*Prof. C. Yuan*)

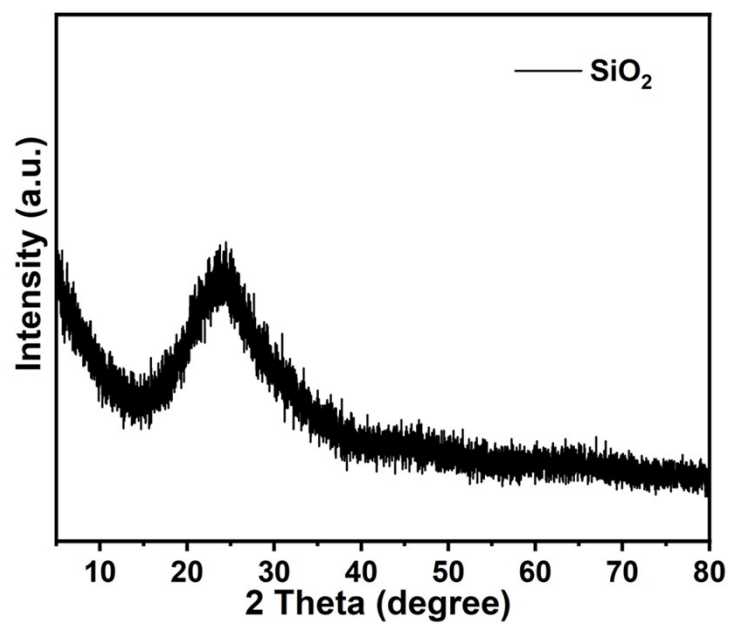

**Fig. S1** XRD pattern of SiO<sub>2</sub> NSs.

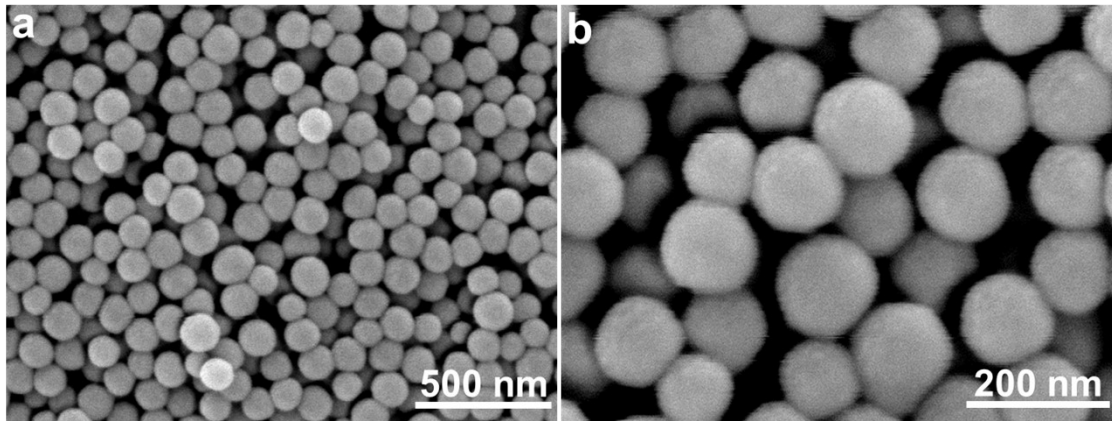

**Fig. S2** (a, b) FESEM images of SiO<sub>2</sub> NSs.

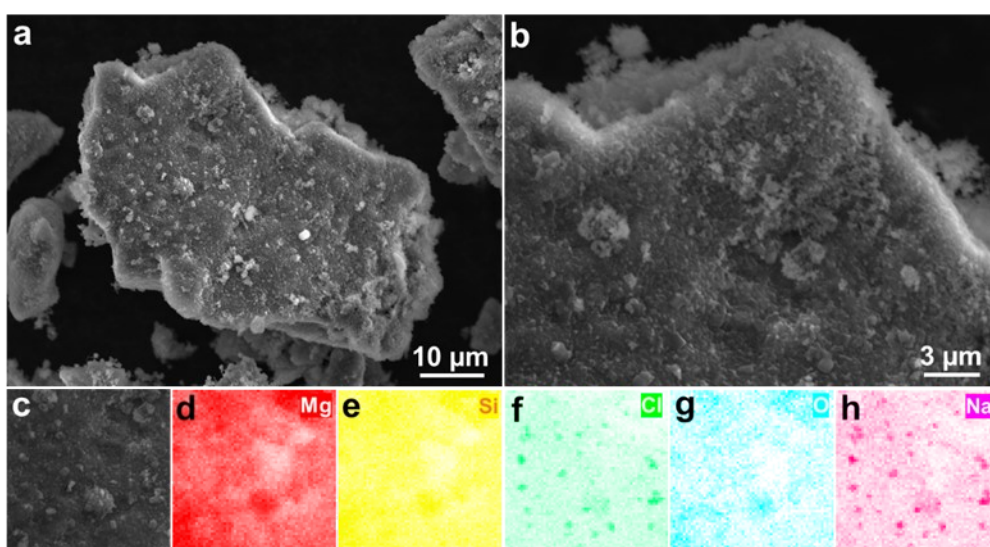

**Fig. S3** (a, b) FESEM images of pristine Si and corresponding (c – h) elemental mappings of Mg, Si, Cl, O and Na.

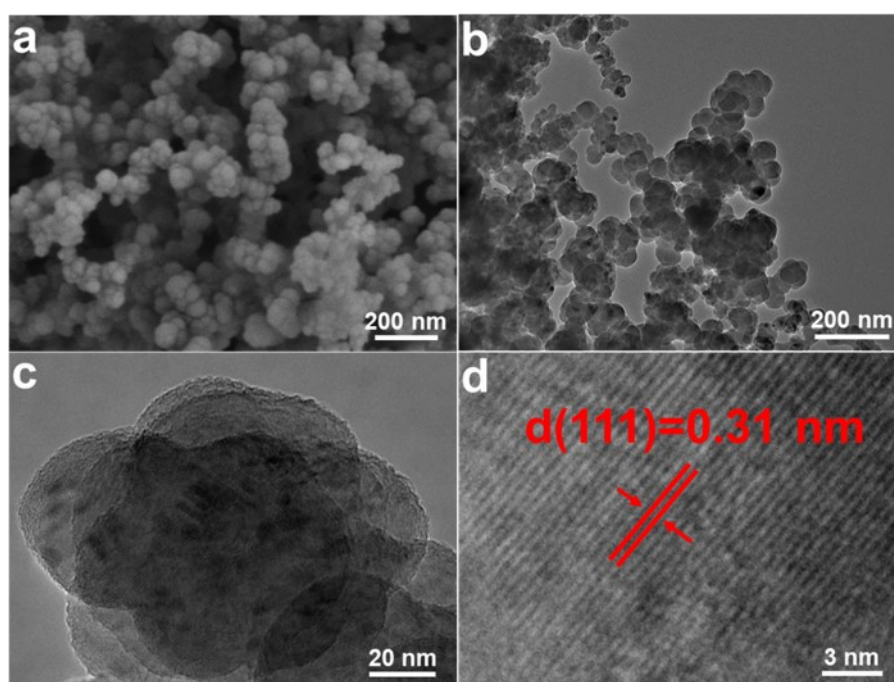

**Fig. S4** (a) FESEM, (b, c) TEM and (d) HRTEM images of Nano-Si.

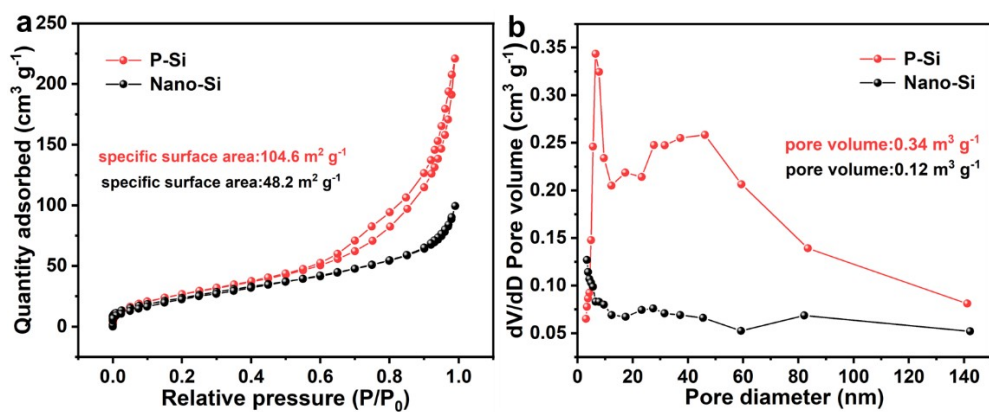

**Fig. S5** (a) N<sub>2</sub> adsorption-desorption isotherms and (b) pore size distribution plots of P-Si and Nano-Si as indicated.

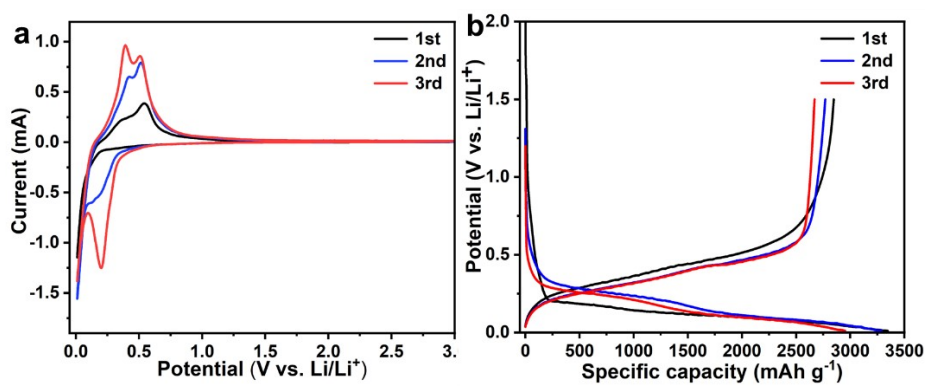

**Fig. S6** (a) CV curves ( $0.1 \text{ mV s}^{-1}$ ) and (b) charge-discharge plots ( $0.1 \text{ A g}^{-1}$ ) of Nano-Si.

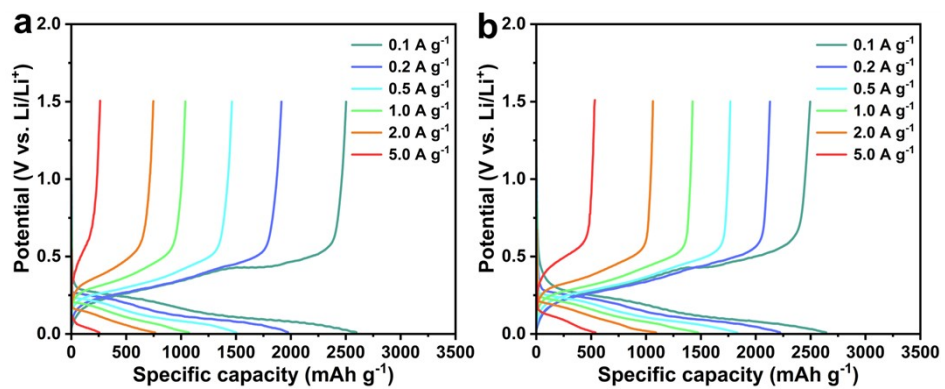

**Fig. S7** Charge and discharge plots of (a) Nano-Si and (b) P-Si under different current densities (0.1 – 5.0 A g<sup>-1</sup>).



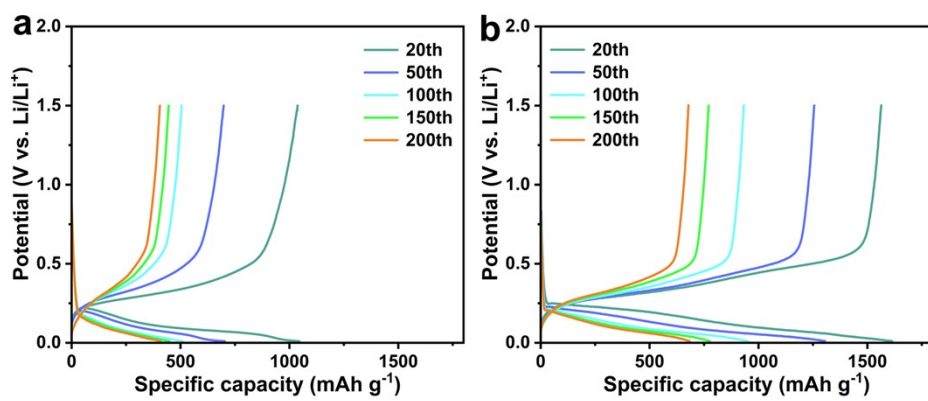

**Fig. S8** Selected Charge and discharge plots of (a) Nano-Si and (b) P-Si at  $0.1 \text{ A g}^{-1}$ .

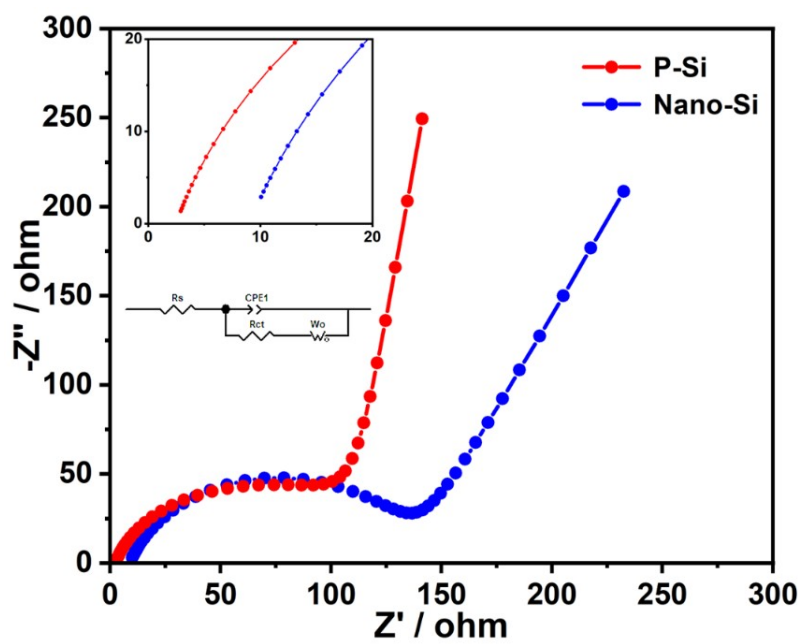

**Fig. S9** Nyquist plots of P-Si and Nano-Si. The insets for the enlarged square region and corresponding equivalent circuit model for fitting, respectively.
